# Supplementary material
Source: PubMed Central journal article supplement (PMC7376691)
Supplement: ao0c00805_si_001.pdf [file ao0c00805_si_001.pdf]

## Supporting Information

### **Polyvinylidene fluoride added ceramics powder composite Near-Field Electrospinned piezoelectric fibers based Low frequency dynamic sensor**

***Cheng-Tang Pan<sup>1,2#</sup>, Shao-Yu Wang<sup>1#</sup>, Chung-Kun Yen<sup>1#</sup>, Ajay Kumar<sup>1,3#</sup>,  
Shiao-Wei Kuo<sup>4</sup>, Jing-Long Zheng<sup>6</sup>, Zhi-Hong Wen<sup>7</sup>, Rachita Singh<sup>10</sup>,  
Satya P. Singh<sup>8</sup>, Muhammad Tahir Khan<sup>11</sup>, Ravi Kumar Chaudhary<sup>12,13</sup>  
Xiaofeng Dai<sup>5</sup>, Aman Chandra Kaushik<sup>5,9#\*</sup>, Dong-Qing Wei<sup>9\*</sup>, Yow-Ling  
Shiue<sup>2\*</sup>, Wei-Hsi Chang<sup>2,6\*</sup>***

*<sup>1</sup>Department of Mechanical and Electro-Mechanical Engineering, National Sun Yat-sen University, 804 Kaohsiung, Taiwan*

*<sup>2</sup>Institute of Medical Science and Technology, National Sun Yat-sen University, 804 Kaohsiung, Taiwan*

*<sup>3</sup>Institute of Biomedical Sciences, National Sun Yat-sen University, 804 Kaohsiung, Taiwan*

*<sup>4</sup>Department of Material and Optoelectronic Science, Center of Crystal Research, National Sun Yat-sen University, 804 Kaohsiung, Taiwan*

*<sup>5</sup>Wuxi School of Medicine, Jiangnan University, Wuxi, China*

*<sup>6</sup>Department of Emergency Medicine, Kaohsiung Armed Forces General Hospital, Kaohsiung 80284, Taiwan*

*<sup>7</sup>Department of Marine Biotechnology and Resources, National Sun Yat-sen University, Kaohsiung 80424, Taiwan*

*<sup>8</sup>School of Computer Science and Engineering, Nanyang Technological University, Singapore*

*<sup>9</sup>State Key Laboratory of Microbial Metabolism and School of Life Sciences and Biotechnology, Shanghai Jiao Tong University, Shanghai 200240, China*

*<sup>10</sup>Department of Electrical and Electronics Engineering, IIMT Engineering College, Uttar Pradesh Technical University, UP, India*

*<sup>11</sup>Capital University of Science and Technology, Islamabad, Pakistan, 44000*

*<sup>12</sup>Department of Biotechnology, Faculty of Life Sciences, Institute of Applied Medicines & Research, 201206, UP, India*

*<sup>13</sup>Molecular Diagnostics & Research Laboratory, Department of Microbiology, Government Institute of Medical Sciences, Greater Noida, UP, India- 201310*

*#Equal contributed, \*corresponding author-*

## Supporting Information

S1

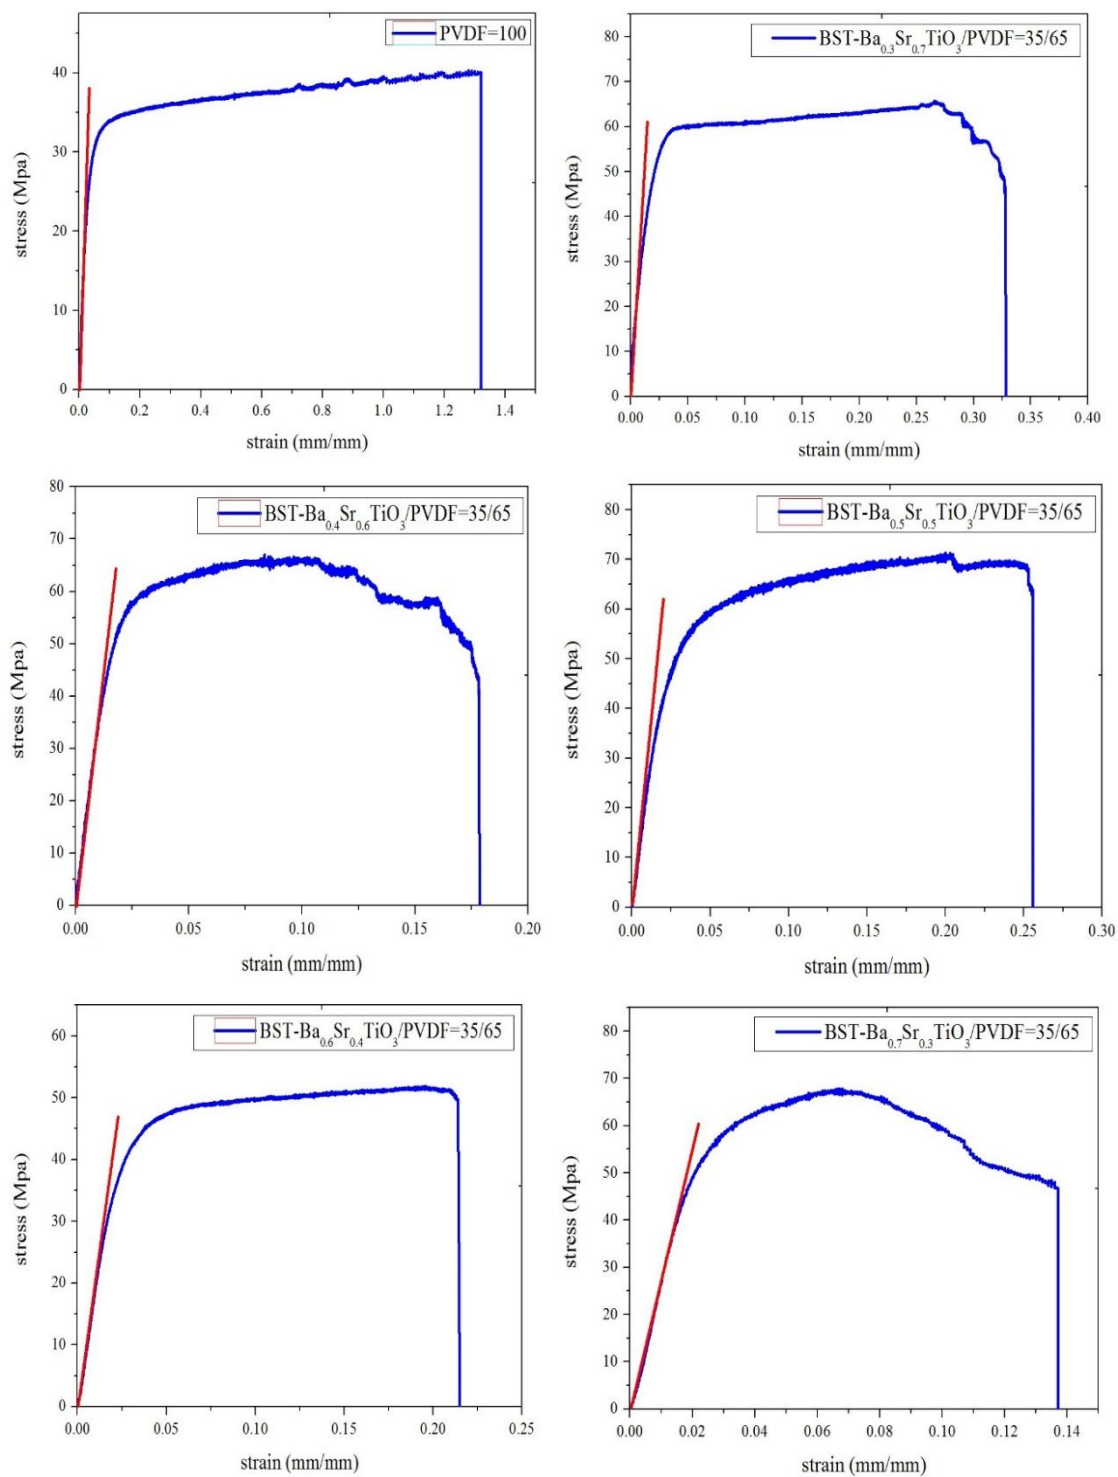

Figure S1: Tensile stress-strain diagram of pure PVDF and Ba<sub>x</sub>Sr<sub>1-x</sub>TiO<sub>3</sub>/PVDF composite fibers

## Supporting Information

S2

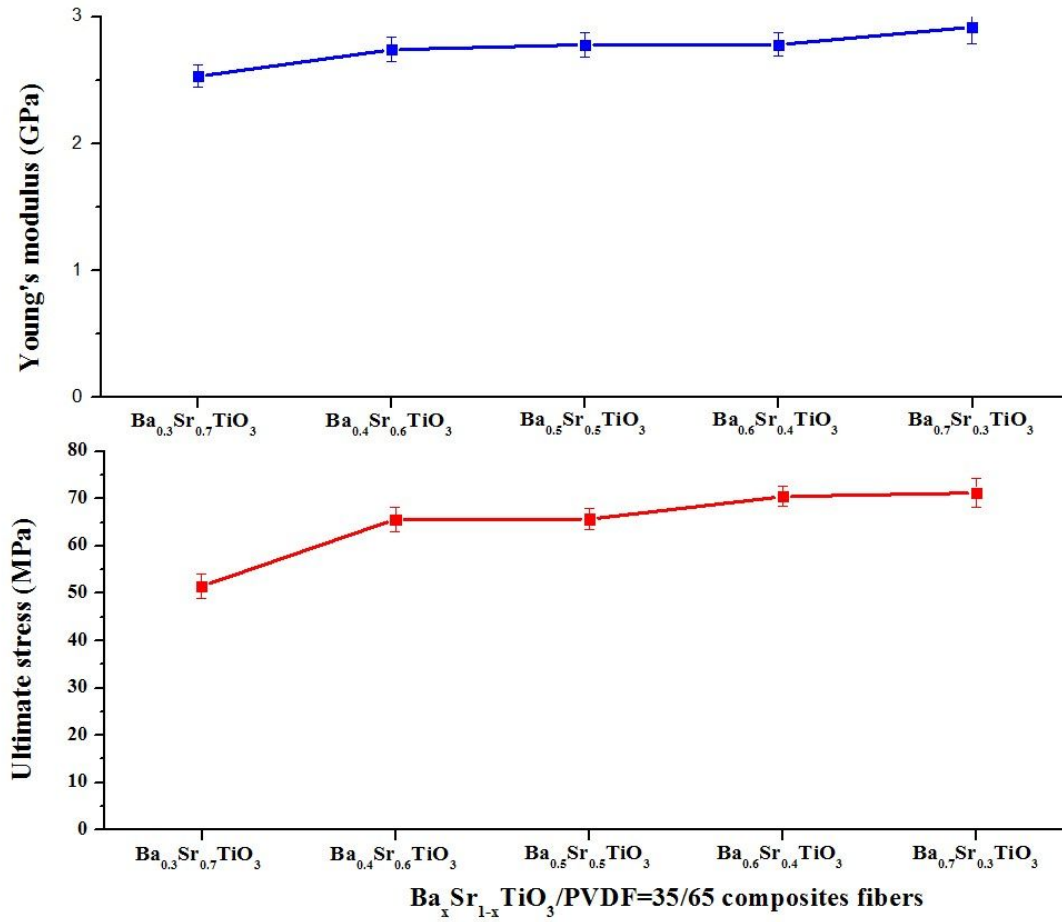

Figure S2: Relationship between Young's modulus and tensile strength of  $Ba_xSr_{1-x}TiO_3/PVDF=35/65$  composite fibers

## Supporting Information

S3

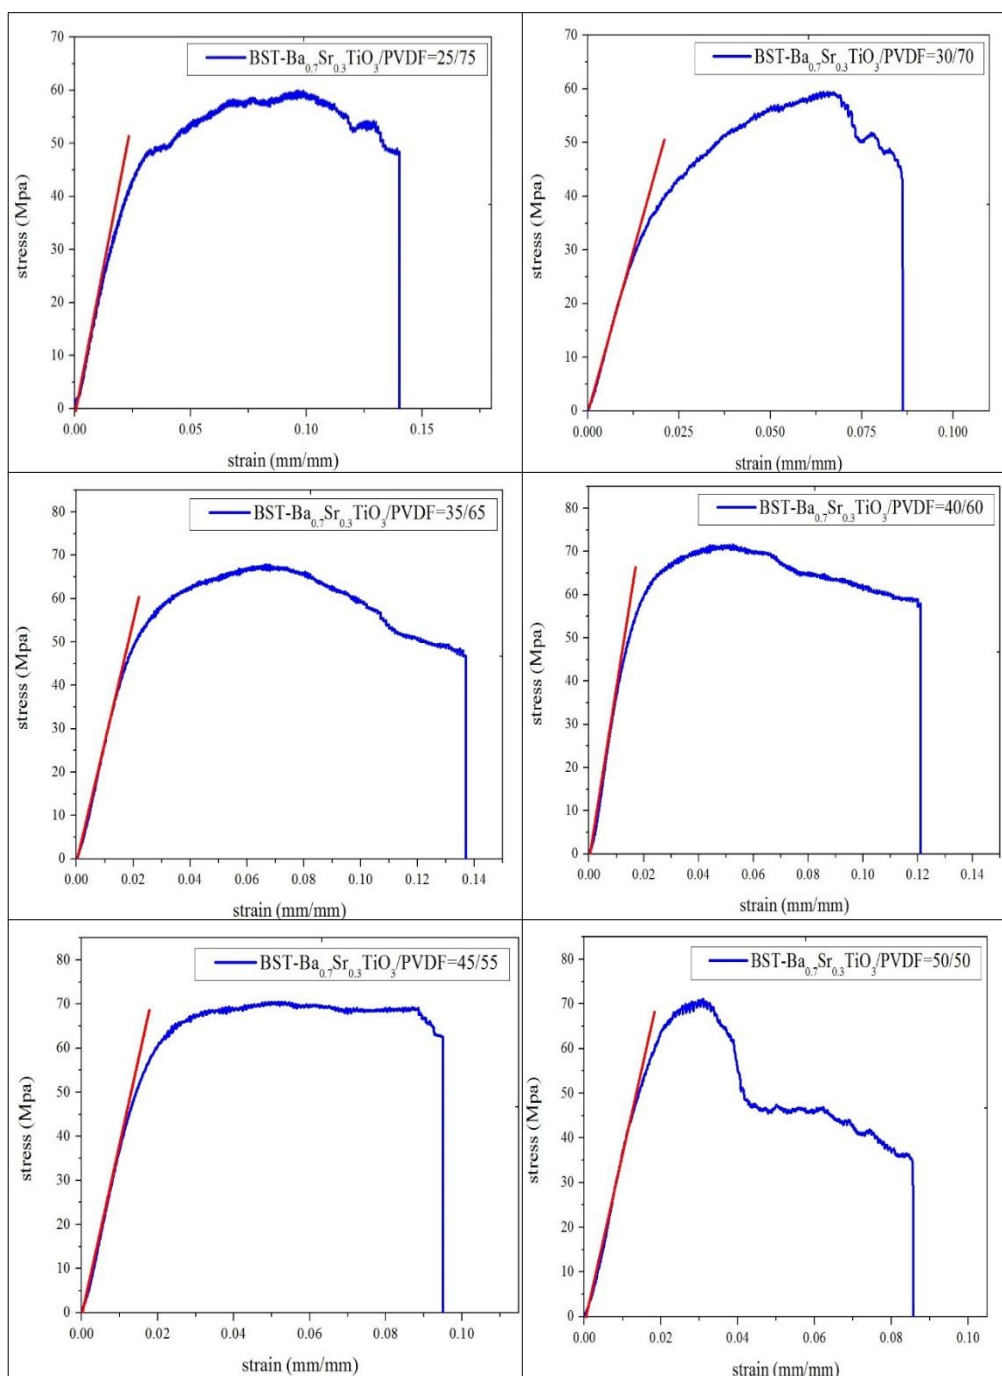

Figure S3: Tensile stress-strain diagram of pure PVDF and Ba<sub>0.7</sub>Sr<sub>0.3</sub>TiO<sub>3</sub>/PVDF composite fibers

## Supporting Information

S4

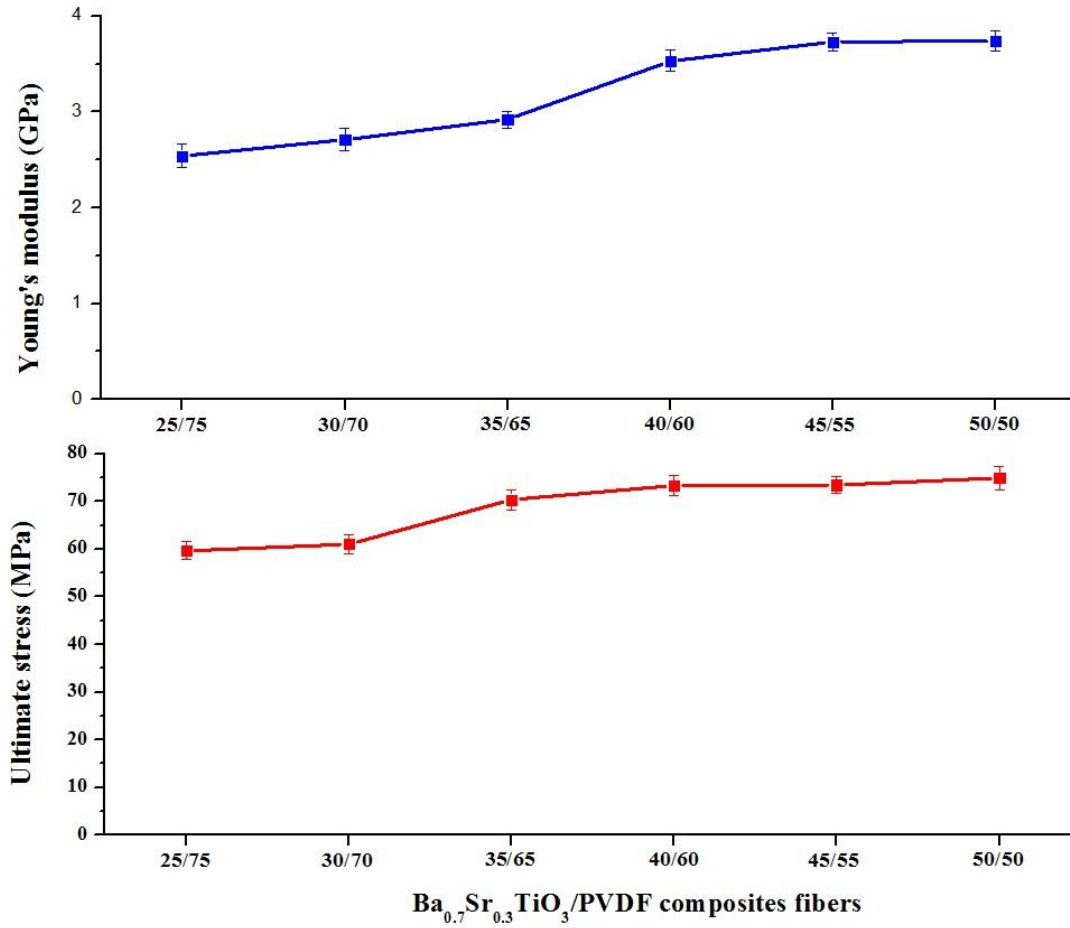

Figure S4: Relationship between Young's modulus and tensile strength of  $Ba_{0.7}Sr_{0.3}TiO_3/PVDF$  composite fibers

S5

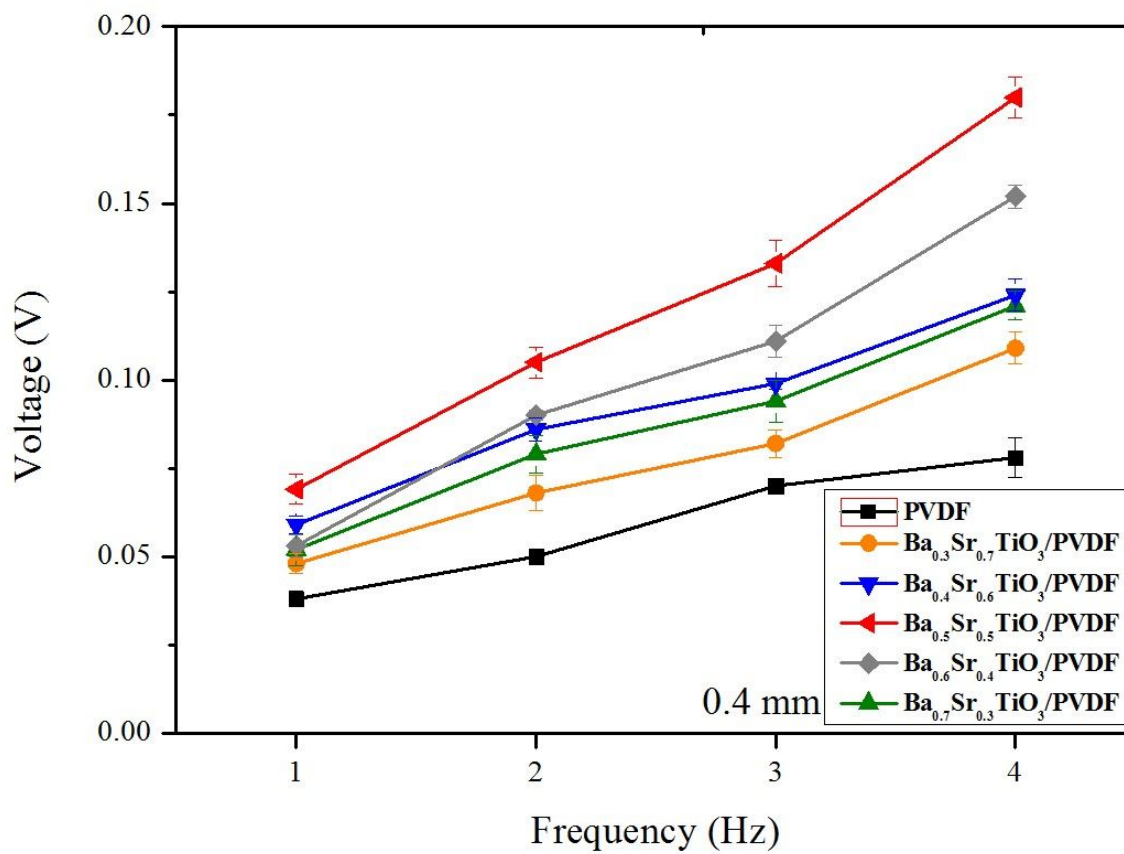

Figure S5: Relationship between frequency and the output voltage of PVDF and BST/PVDF energy harvester

## Supporting Information

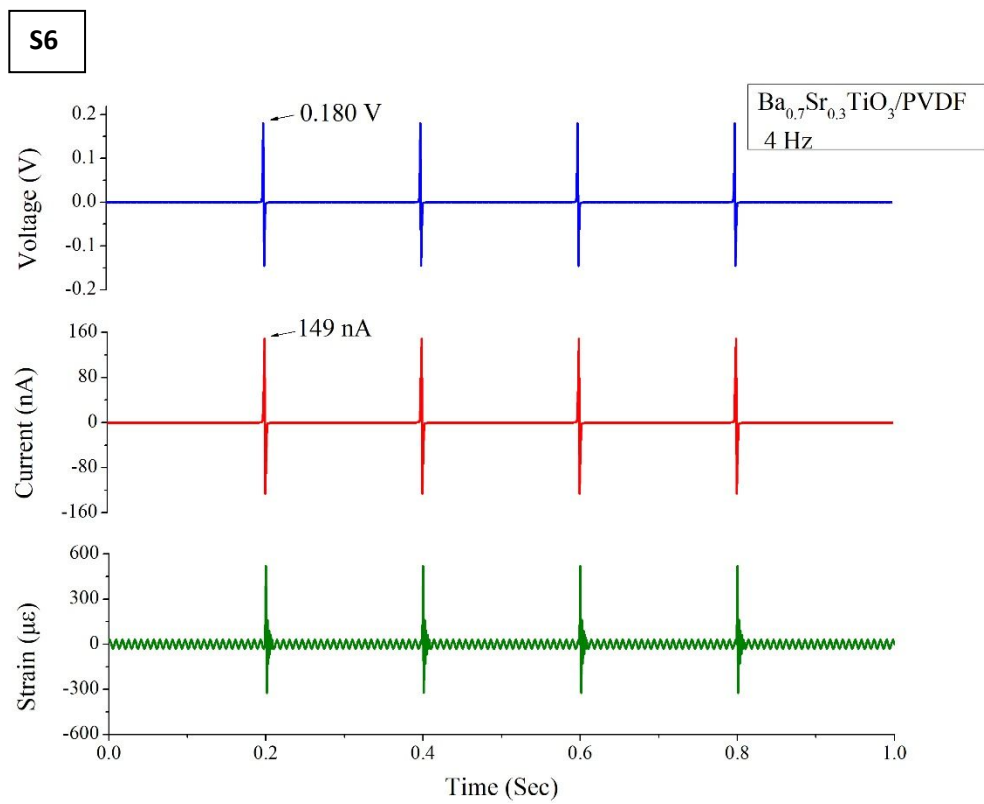

Figure S6: Output voltage of PVDF and  $\text{Ba}_{0.7}\text{Sr}_{0.3}\text{TiO}_3/\text{PVDF}$  piezoelectric fibers tapping parallel electrodes at 4 Hz

## Supporting Information

S7

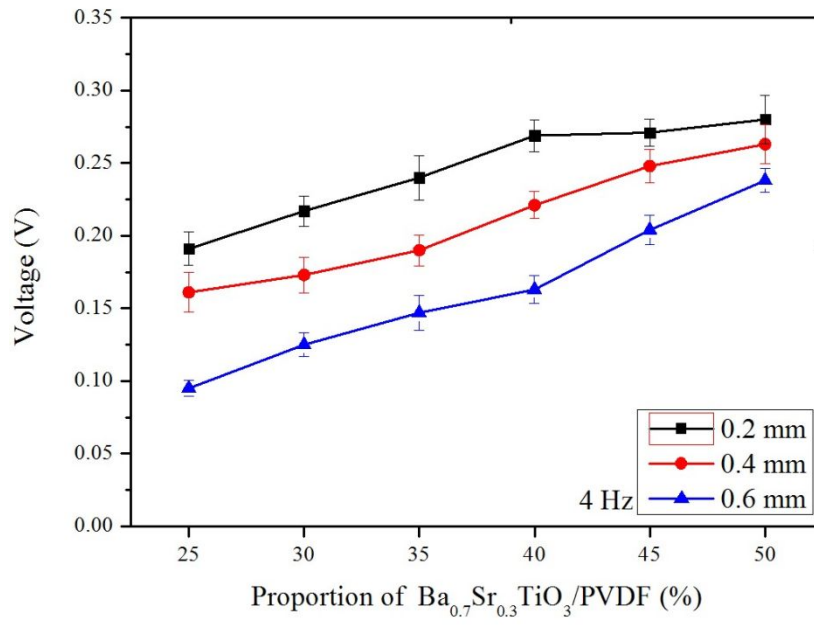

Figure S7: Relationship between the parallel electrode gap and voltage of different ratios



## Supporting Information

S8

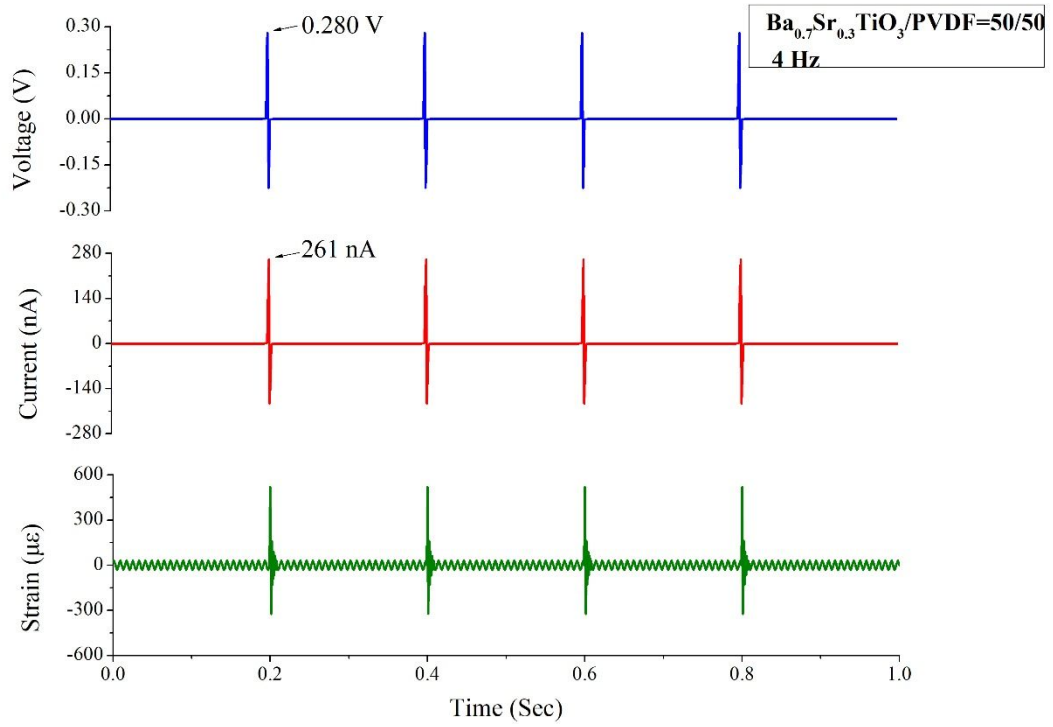

Figure S8:  $\text{Ba}_{0.7}\text{Sr}_{0.3}\text{TiO}_3/\text{PVDF}=50/50$  composite piezoelectric fibers at a parallel gap of 0.20 mm and a frequency of 4 Hz

S9

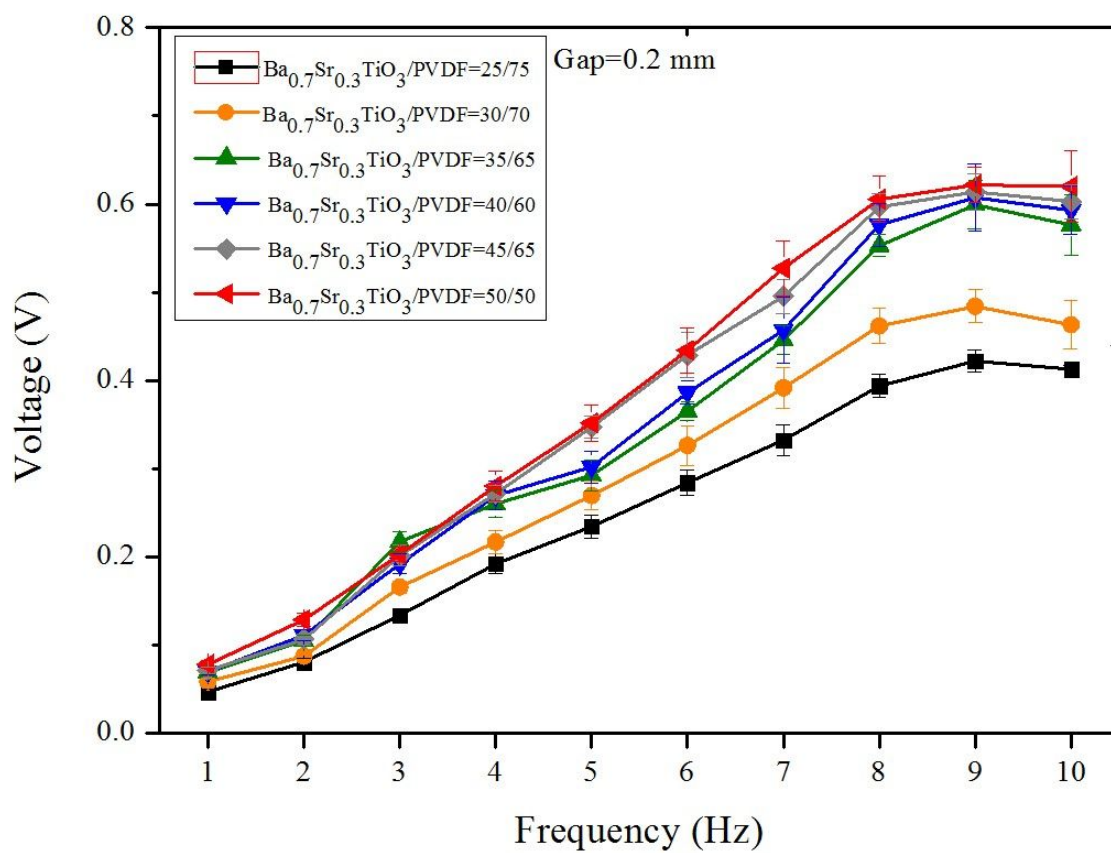

Figure S9: Relationship between frequency and voltage of  $\text{Ba}_{0.7}\text{Sr}_{0.3}\text{TiO}_3/\text{PVDF}$  piezoelectric fibers with different ratios of 0.20 mm parallel electrodes

## Supporting Information

S10

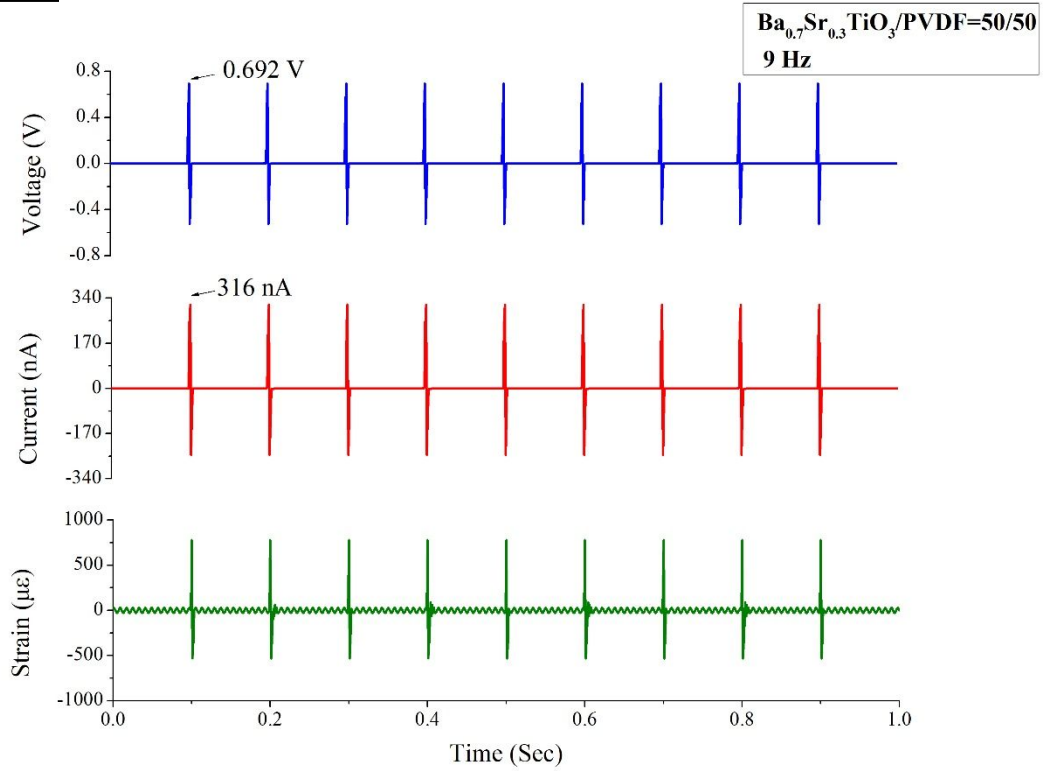

Figure S10:  $\text{Ba}_{0.7}\text{Sr}_{0.3}\text{TiO}_3/\text{PVDF}=50/50$  composite piezoelectric fibers at a parallel gap of 0.20 mm and a frequency of 9 Hz

## Supporting Information

S11

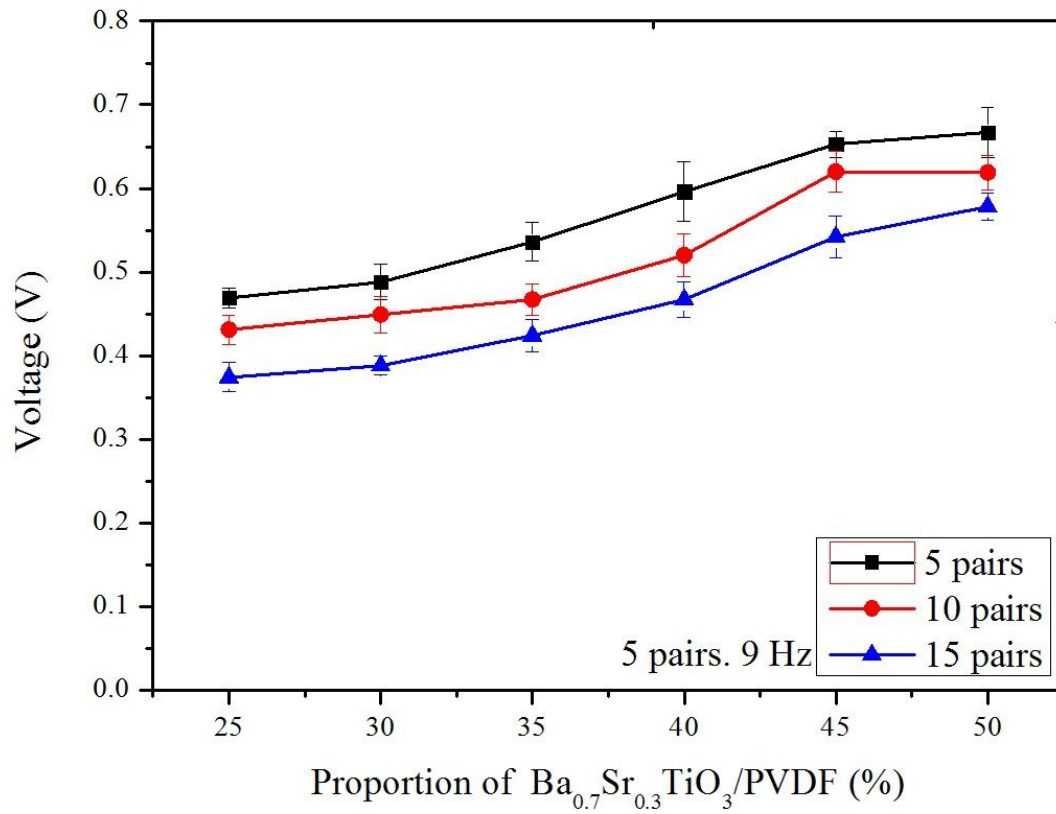

Figure S11: Relationship between pole number and voltage of Ba<sub>0.7</sub>Sr<sub>0.3</sub>TiO<sub>3</sub>/PVDF piezoelectric fibers

## Supporting Information

S12

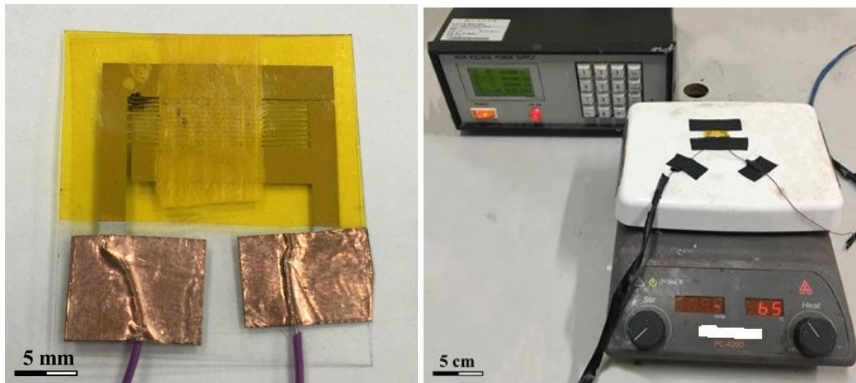

S12 (a)

S12 (b)

Figure S12: Polarization of composites fibers (a) collapsed electrode with polarization failure and (b) BST/PVDF composites fibers attached to the IDT for 1-hour repolarization process (1400 V and 65 °C)

### Supporting Information

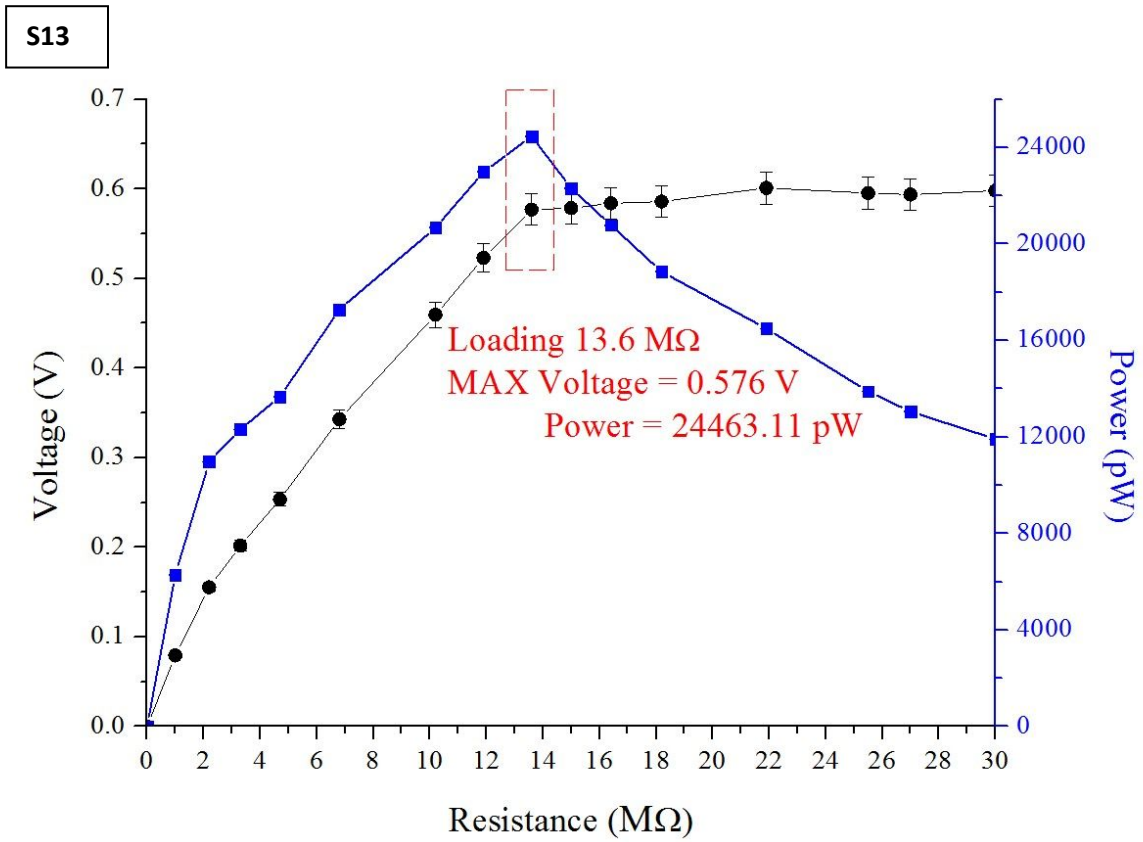

Figure S13: Load voltage and output power of  $Ba_{0.7}Sr_{0.3}TiO_3/PVDF=50/50$  energy harvester

## Supporting Information

S14

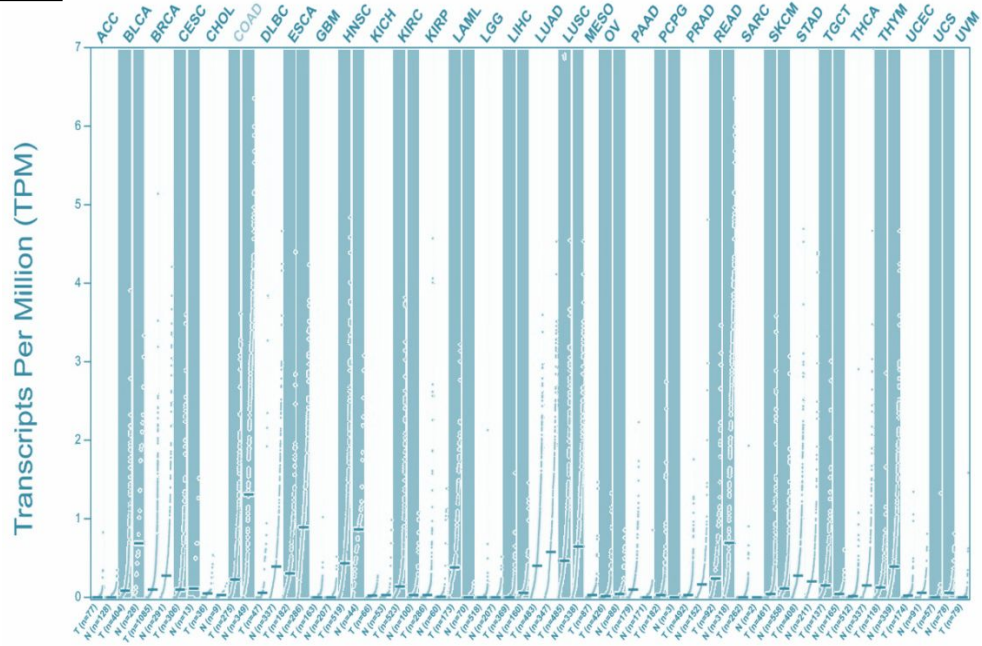

Figure S14: Expression landscape from in TCGA cohorts. Pan-cancer expression landscape where “T” stands for tumor tissue and “N” stands for paired normal tissue. The expression abundance is measured by log-normalized transcripts per million (TPM).
